# Supplementary material for: Neoadjuvant Chemotherapy Improves the Immunosuppressive Microenvironment of Bladder Cancer and Increases the Sensitivity to Immune Checkpoint Blockade
Source: Hindawi journal article supplement (doi:10.1155/2022/9962397), 2022-07-21
Supplement: f2 [file 9962397.f2.pdf]

| NCBI Accession ID | Gene Symbol | Gene name                                | Gene function        |
|-------------------|-------------|------------------------------------------|----------------------|
| NM_078481         | ADGRE5      | adhesion G protein-coupled receptor      | Adhesion,migration   |
| NM_006566         | CD226       | CD226 molecule                           |                      |
| NM_001775         | CD38        | CD38 molecule                            |                      |
| NM_000610         | CD44        | CD44 molecule Indian blood group         |                      |
| NM_001777         | CD47        | CD47 molecule                            |                      |
| NM_001040033      | CD53        | CD53 molecule                            |                      |
| NM_000875         | IGF1R       | insulin like growth factor 1 receptor    |                      |
| NM_181501         | ITGA1       | integrin subunit alpha 1                 |                      |
| NM_002208         | ITGAE       | integrin subunit alpha E                 |                      |
| NM_002211         | ITGB1       | integrin subunit beta 1                  |                      |
| NM_130760         | MADCAM1     | mucosal vascular addressin cell          |                      |
| NM_181351         | NCAM1       | neural cell adhesion molecule 1          |                      |
| NM_001042724      | NECTIN2     | nectin cell adhesion molecule 2          |                      |
| NM_000442         | PECAM1      | platelet and endothelial cell adhesion   |                      |
|                   |             |                                          |                      |
| NM_001765         | CD1C        | CD1c molecule                            | Antigen presentation |
| NM_001766         | CD1D        | CD1d molecule                            |                      |
| NM_004233         | CD83        | CD83 molecule                            |                      |
|                   |             |                                          |                      |
| NM_001025159      | CD74        | CD74 molecule                            | Antigen processing   |
| NM_002116         | HLA-A       | major histocompatibility complex class I |                      |
| NM_005514         | HLA-B       | major histocompatibility complex class   |                      |
| NM_002117         | HLA-C       | major histocompatibility complex class   |                      |
| NM_006120         | HLA-DMA     | major histocompatibility complex class   |                      |
| NM_002118         | HLA-DMB     | major histocompatibility complex class   |                      |
| NM_002119         | HLA-DOA     | major histocompatibility complex class   |                      |
| NM_002120         | HLA-DOB     | major histocompatibility complex class   |                      |
| NM_033554         | HLA-DPA1    | major histocompatibility complex class   |                      |
| NM_002121         | HLA-DPB1    | major histocompatibility complex class   |                      |
| NM_002122         | HLA-DQA1    | major histocompatibility complex class   |                      |
| NM_020056         | HLA-DQA2    | major histocompatibility complex class   |                      |
| NM_001198858      | HLA-DQB2    | major histocompatibility complex class   |                      |
| NM_019111         | HLA-DRA     | major histocompatibility complex class   |                      |
| NM_002124         | HLA-DRB1    | major histocompatibility complex class   |                      |
| NM_005516         | HLA-E       | major histocompatibility complex class   |                      |
| NM_001098479      | HLA-F       | major histocompatibility complex class I |                      |
| NR_026972         | HLA-F-AS1   | HLA-F antisense RNA 1                    |                      |
| NM_002127         | HLA-G       | major histocompatibility complex class   |                      |
|                   |             |                                          |                      |
| NM_000633         | BCL2        | B-cell CLL lymphoma 2                    | Apoptosis            |
| NM_138621         | BCL2L11     | BCL2 like 11                             |                      |
| NM_052850         | GADD45GIP1  | GADD45G interacting protein 1            |                      |
| NM_003810         | TNFSF10     | tumor necrosis factor superfamily        |                      |
|                   |             |                                          |                      |
| NM_001178098      | CD19        | CD19 molecule                            |                      |
| NM_001771         | CD22        | CD22 molecule                            |                      |
| NM_000566         | FCGR1A      | Fc fragment of IgG receptor Ia           |                      |
| NM_004001         | FCGR2B      | Fc fragment of IgG receptor IIb          |                      |

|              |          |                                         |                           |
|--------------|----------|-----------------------------------------|---------------------------|
| NM_001184866 | FCRLA    | Fc receptor like A                      | B cell marker             |
| NM_144646    | JCHAIN   | joining chain of multimeric IgA and IgM |                           |
| NM_006181    | NTN3     | netrin 3                                |                           |
| NM_006235    | POU2AF1  | POU class 2 associating factor 1        |                           |
| NM_003930    | SKAP2    | src kinase associated phosphoprotein 2  |                           |
| NM_001192    | TNFRSF17 | tumor necrosis factor receptor          |                           |
| NM_006573    | TNFSF13B | tumor necrosis factor superfamily       |                           |
|              |          |                                         |                           |
| NM_001039933 | CD79B    | CD79b molecule                          | B cell receptor signaling |
| NM_001783    | CD79A    | CD79a molecule                          |                           |
| NM_000043    | FAS      | Fas cell surface death receptor         |                           |
|              |          |                                         |                           |
| NM_000675    | ADORA2A  | adenosine A2a receptor                  | Checkpoint pathway        |
| NM_181780    | BTLA     | B and T lymphocyte associated           |                           |
| NM_022153    | C10orf54 | chromosome 10 open reading frame 54     |                           |
| NM_007053    | CD160    | CD160 molecule                          |                           |
| NM_001166663 | CD244    | CD244 molecule                          |                           |
| NM_014143    | CD274    | CD274 molecule                          |                           |
| NM_001024736 | CD276    | CD276 molecule                          |                           |
| NM_006139    | CD28     | CD28 molecule                           |                           |
| NM_001778    | CD48     | CD48 molecule                           |                           |
| NM_001781    | CD69     | CD69 molecule                           |                           |
| NM_005191    | CD80     | CD80 molecule                           |                           |
| NM_175862    | CD86     | CD86 molecule                           |                           |
| NM_001712    | CEACAM1  | carcinoembryonic antigen related cell   |                           |
| NM_001098175 | ENTPD1   | ectonucleoside triphosphate             |                           |
| NM_005442    | EOMES    | eomesodermin                            |                           |
| NM_032782    | HAVCR2   | hepatitis A virus cellular receptor 2   |                           |
| NM_012092    | ICOS     | inducible T-cell costimulator           |                           |
| NM_015259    | ICOSLG   | inducible T-cell costimulator ligand    |                           |
| NM_194294    | IDO2     | indoleamine 23-dioxygenase 2            |                           |
| NM_002526    | NT5E     | 5-nucleotidase ecto                     |                           |
| NM_025239    | PDCD1LG2 | programmed cell death 1 ligand 2        |                           |
| NM_006505    | PVR      | poliovirus receptor                     |                           |
| NM_005651    | TDO2     | tryptophan 23-dioxygenase               |                           |
| NM_000660    | TGFB1    | transforming growth factor beta 1       |                           |
| NM_000594    | TNF      | tumor necrosis factor                   |                           |
| NM_003820    | TNFRSF14 | tumor necrosis factor receptor          |                           |
| NM_003807    | TNFSF14  | tumor necrosis factor superfamily       |                           |
| NM_005092    | TNFSF18  | tumor necrosis factor superfamily       |                           |
| NM_003326    | TNFSF4   | tumor necrosis factor superfamily       |                           |
| NM_024626    | VTCN1    | V-set domain containing T cell          |                           |
|              |          |                                         |                           |
| NM_002987    | CCL17    | C-C motif chemokine ligand 17           | Chemokine signaling       |
| NM_004591    | CCL20    | C-C motif chemokine ligand 20           |                           |
| NM_002990    | CCL22    | C-C motif chemokine ligand 22           |                           |
| NM_005508    | CCR4     | C-C motif chemokine receptor 4          |                           |
| NM_004367    | CCR6     | C-C motif chemokine receptor 6          |                           |
| NM_001511    | CXCL1    | C-X-C motif chemokine ligand 1          |                           |

|              |         |                                          |                            |
|--------------|---------|------------------------------------------|----------------------------|
| NM_001557    | CXCR2   | C-X-C motif chemokine receptor 2         |                            |
| NM_001504    | CXCR3   | C-X-C motif chemokine receptor 3         |                            |
| NM_000265    | NCF1    | neutrophil cytosolic factor 1            |                            |
| NM_001171623 | VEGFA   | vascular endothelial growth factor A     |                            |
|              |         |                                          |                            |
| NM_001295    | CCR1    | C-C motif chemokine receptor 1           | Cytokine signaling         |
| NM_000395    | CSF2RB  | colony stimulating factor 2 receptor     |                            |
| NM_000584    | CXCL8   | C-X-C motif chemokine ligand 8           |                            |
| NM_000601    | HGF     | hepatocyte growth factor                 |                            |
| NM_001547    | IFIT2   | interferon induced protein with          |                            |
| NM_002188    | IL13    | interleukin 13                           |                            |
| NM_000575    | IL1A    | interleukin 1 alpha                      |                            |
| NM_021803    | IL21    | interleukin 21                           |                            |
| NM_000589    | IL4     | interleukin 4                            |                            |
| NM_000600    | IL6     | interleukin 6                            |                            |
| NM_000880    | IL7     | interleukin 7                            |                            |
| NM_003811    | TNFSF9  | tumor necrosis factor superfamily        |                            |
| NM_005211    | CSF1R   | colony stimulating factor 1 receptor     |                            |
| NM_000417    | IL2RA   | interleukin 2 receptor subunit alpha     |                            |
| NM_003152    | STAT5A  | signal transducer and activator of       |                            |
|              |         |                                          |                            |
| NM_130441    | CLEC4C  | C-type lectin domain family 4 member     | Dendritic cell             |
| NM_017912    | HERC6   | HECT and RLD domain containing E3        |                            |
| NM_002183    | IL3RA   | interleukin 3 receptor subunit alpha     |                            |
| NM_000887    | ITGAX   | integrin subunit alpha X                 |                            |
| NM_003873    | NRP1    | neuropilin 1                             |                            |
| NM_003265    | TLR3    | toll like receptor 3                     |                            |
| NM_025224    | ZBTB46  | zinc finger and BTB domain containing    |                            |
|              |         |                                          |                            |
| NM_000591    | CD14    | CD14 molecule                            | Dendritic cell, macrophage |
| NM_021155    | CD209   | CD209 molecule                           |                            |
| NM_001142345 | CMKLR1  | chemerin chemokine-like receptor 1       |                            |
| NM_052872    | IL17F   | interleukin 17F                          |                            |
| NM_016584    | IL23A   | interleukin 23 subunit alpha             |                            |
| NM_002438    | MRC1    | mannose receptor C type 1                |                            |
|              |         |                                          |                            |
| NM_001242    | CD27    | CD27 molecule                            | Drug target                |
| NM_001250    | CD40    | CD40 molecule                            |                            |
| NM_001252    | CD70    | CD70 molecule                            |                            |
| NM_005214    | CTLA4   | cytotoxic T-lymphocyte associated        |                            |
| NM_002164    | IDO1    | indoleamine 23-dioxygenase 1             |                            |
| NM_000572    | IL10    | interleukin 10                           |                            |
| NM_000882    | IL12A   | interleukin 12A                          |                            |
| NM_002187    | IL12B   | interleukin 12B                          |                            |
| NM_000586    | IL2     | interleukin 2                            |                            |
| NM_014218    | KIR2DL1 | killer cell immunoglobulin like receptor |                            |
| NM_002262    | KLRD1   | killer cell lectin like receptor D1      |                            |
| NM_002286    | LAG3    | lymphocyte activating 3                  |                            |
| NM_021950    | MS4A1   | membrane spanning 4-domains A1           |                            |

|              |          |                                      |                        |
|--------------|----------|--------------------------------------|------------------------|
| NM_005018    | PDCD1    | programmed cell death 1              |                        |
| NM_006928    | PMEL     | premelanosome protein                |                        |
| NM_021181    | SLAMF7   | SLAM family member 7                 |                        |
| NM_139276    | STAT3    | signal transducer and activator of   |                        |
| NM_017442    | TLR9     | toll like receptor 9                 |                        |
| NM_004195    | TNFRSF18 | tumor necrosis factor receptor       |                        |
| NM_003327    | TNFRSF4  | tumor necrosis factor receptor       |                        |
| NM_001561    | TNFRSF9  | tumor necrosis factor receptor       |                        |
|              |          |                                      |                        |
| NM_006399    | BATF     | basic leucine zipper ATF-like        | Helper T cells         |
| NM_001123396 | CCR2     | C-C motif chemokine receptor 2       |                        |
| NM_000616    | CD4      | CD4 molecule                         |                        |
| NM_001002295 | GATA3    | GATA binding protein 3               |                        |
| NM_002190    | IL17A    | interleukin 17A                      |                        |
| NM_005060    | RORC     | RAR related orphan receptor C        |                        |
| NM_003151    | STAT4    | signal transducer and activator of   |                        |
| NM_003153    | STAT6    | signal transducer and activator of   |                        |
|              |          |                                      |                        |
| NM_001025091 | ABCF1    | ATP binding cassette subfamily F     | Housekeeping           |
| NM_000402    | G6PD     | glucose-6-phosphate dehydrogenase    |                        |
| NM_000181    | GUSB     | glucuronidase beta                   |                        |
| NM_000190    | HMB5     | hydroxymethylbilane synthase         |                        |
| NM_170707    | LMNA     | lamin A C                            |                        |
| NM_002332    | LRP1     | LDL receptor related protein 1       |                        |
| NM_000937    | POLR2A   | polymerase RNA II subunit A          |                        |
| NM_004168    | SDHA     | succinate dehydrogenase complex      |                        |
| NM_003194    | TBP      | TATA-box binding protein             |                        |
| NM_001128148 | TFRC     | transferrin receptor                 |                        |
| NM_178014    | TUBB     | tubulin beta class I                 |                        |
|              |          |                                      |                        |
| NM_021913    | AXL      | AXL receptor tyrosine kinase         | Innate immune response |
| NM_015991    | C1QA     | complement component 1 q             |                        |
| NM_007329    | DMBT1    | deleted in malignant brain tumors 1  |                        |
| NM_022168    | IFIH1    | interferon induced with helicase C   |                        |
| NM_000625    | NOS2     | nitric oxide synthase 2              |                        |
| NM_016562    | TLR7     | toll like receptor 7                 |                        |
| NM_000491    | C1QB     | complement component 1 q             |                        |
| NM_005564    | LCN2     | lipocalin 2                          |                        |
| NM_000239    | LYZ      | lysozyme                             |                        |
| NM_139012    | MAPK14   | mitogen-activated protein kinase 14  |                        |
| NM_002415    | MIF      | macrophage migration inhibitory      |                        |
|              |          |                                      |                        |
| NM_014314    | DDX58    | DEXD H-box helicase 58               | Interferon signaling   |
| NM_005533    | IFI35    | interferon induced protein 35        |                        |
| NM_006820    | IFI44L   | interferon induced protein 44 like   |                        |
| NM_022873    | IFI6     | interferon alpha inducible protein 6 |                        |
| NM_002460    | IRF4     | interferon regulatory factor 4       |                        |
| NM_001178046 | MX1      | MX dynamin like GTPase 1             |                        |
| NM_016817    | OAS2     | 2-5-oligoadenylate synthetase 2      |                        |

|                 |        |                                       |                        |
|-----------------|--------|---------------------------------------|------------------------|
| NM_006187       | OAS3   | 2-5-oligoadenylate synthetase 3       |                        |
|                 |        |                                       |                        |
| NM_001081637    | LILRB1 | leukocyte immunoglobulin like         | Leukocyte inhibition   |
| NM_007161       | LST1   | leukocyte specific transcript 1       |                        |
|                 |        |                                       |                        |
| NM_002209       | ITGAL  | integrin subunit alpha L              | Leukocyte migration    |
| NM_001145808    | ITGAM  | integrin subunit alpha M              |                        |
| NM_000889       | ITGB7  | integrin subunit beta 7               |                        |
| NM_000655       | SELL   | selectin L                            |                        |
| NM_001078       | VCAM1  | vascular cell adhesion molecule 1     |                        |
|                 |        |                                       |                        |
| NM_002351       | SH2D1A | SH2 domain containing 1A              | Lymphocyte activation  |
| NM_053282       | SH2D1B | SH2 domain containing 1B              |                        |
|                 |        |                                       |                        |
| NM_006060       | IKZF1  | IKAROS family zinc finger 1           | Lymphocyte development |
| NM_016260       | IKZF2  | IKAROS family zinc finger 2           |                        |
| NM_022465       | IKZF4  | IKAROS family zinc finger 4           |                        |
|                 |        |                                       |                        |
| NM_002988       | CCL18  | C-C motif chemokine ligand 18         | Lymphocyte infiltrate  |
| NM_002982       | CCL2   | C-C motif chemokine ligand 2          |                        |
| NM_002989       | CCL21  | C-C motif chemokine ligand 21         |                        |
| NM_002983       | CCL3   | C-C motif chemokine ligand 3          |                        |
| NM_002984       | CCL4   | C-C motif chemokine ligand 4          |                        |
| NM_002985       | CCL5   | C-C motif chemokine ligand 5          |                        |
| NM_001100168    | CCR5   | C-C motif chemokine receptor 5 gene   |                        |
| NM_001767       | CD2    | CD2 molecule                          |                        |
| NM_001774       | CD37   | CD37 molecule                         |                        |
| NM_001803       | CD52   | CD52 molecule                         |                        |
| NM_001780       | CD63   | CD63 molecule                         |                        |
| NM_007074       | CORO1A | coronin 1A                            |                        |
| NM_004079       | CTSS   | cathepsin S                           |                        |
| ENST00000399220 | CX3CR1 | C-X3-C motif chemokine receptor 1     |                        |
| ENST00000435290 | CX3CR1 | C-X3-C motif chemokine receptor 1     |                        |
| ENST00000541347 | CX3CR1 | C-X3-C motif chemokine receptor 1     |                        |
| NM_001171174    | CX3CR1 | C-X3-C motif chemokine receptor 1     |                        |
| NM_003467       | CXCR4  | C-X-C motif chemokine receptor 4      |                        |
| NM_006564       | CXCR6  | C-X-C motif chemokine receptor 6      |                        |
| NM_004106       | FCER1G | Fc fragment of IgE receptor Ig        |                        |
| NM_001465       | FYB    | FYN binding protein                   |                        |
| NM_006144       | GZMA   | granzyme A                            |                        |
| NM_004131       | GZMB   | granzyme B                            |                        |
| NM_033423       | GZMH   | granzyme H                            |                        |
| NM_002104       | GZMK   | granzyme K                            |                        |
| NM_005849       | IGSF6  | immunoglobulin superfamily member 6   |                        |
| NM_001558       | IL10RA | interleukin 10 receptor subunit alpha |                        |
| NM_000206       | IL2RG  | interleukin 2 receptor subunit gamma  |                        |
| NM_000211       | ITGB2  | integrin subunit beta 2               |                        |
| NM_001098526    | JAML   | junction adhesion molecule like       |                        |
| NM_005561       | LAMP1  | lysosomal associated membrane         |                        |

|                 |         |                                          |                |
|-----------------|---------|------------------------------------------|----------------|
| NM_006762       | LAPTM5  | lysosomal protein transmembrane 5        |                |
| NM_001080978    | LILRB2  | leukocyte immunoglobulin like            |                |
| NM_002348       | LY9     | lymphocyte antigen 9                     |                |
| NM_005601       | NKG7    | natural killer cell granule protein 7    |                |
| NM_001199797    | PTPN7   | protein tyrosine phosphatase non-        |                |
| NM_002838       | PTPRC   | protein tyrosine phosphatase receptor    |                |
| NM_015474       | SAMHD1  | SAM and HD domain containing             |                |
| NM_014450       | SIT1    | signaling threshold regulating           |                |
| NM_020125       | SLAMF8  | SLAM family member 8                     |                |
| NM_002727       | SRGN    | serglycin                                |                |
| NM_054114       | TAGAP   | T-cell activation RhoGTPase activating   |                |
| NM_001003806    | TARP    | TCR gamma alternate reading frame        |                |
| NM_138636       | TLR8    | toll like receptor 8                     |                |
| NM_014350       | TNFAIP8 | TNF alpha induced protein 8              |                |
| NM_198125       | TYROBP  | TYRO protein tyrosine kinase binding     |                |
|                 |         |                                          |                |
| NM_001623       | AIF1    | allograft inflammatory factor 1          | Macrophage     |
| NM_001141       | ALOX15B | arachidonate 15-lipoxygenase type B      |                |
| NM_004244       | CD163   | CD163 molecule                           |                |
| NM_001251       | CD68    | CD68 molecule                            |                |
| NM_000569       | FCGR3A  | Fc fragment of IgG receptor IIIa         |                |
|                 |         |                                          |                |
| NM_000045       | ARG1    | arginase 1                               | Myeloid marker |
| NM_001772       | CD33    | CD33 molecule                            |                |
| NM_001816       | CEACAM8 | carcinoembryonic antigen related cell    |                |
| NM_000250       | MPO     | myeloperoxidase                          |                |
| NM_002964       | S100A8  | S100 calcium binding protein A8          |                |
| NM_002965       | S100A9  | S100 calcium binding protein A9          |                |
| NM_002033       | FUT4    | fucosyltransferase 4                     |                |
|                 |         |                                          |                |
| NM_000717       | CA4     | carbonic anhydrase 4                     | Neutrophil     |
| NM_032564       | DGAT2   | diacylglycerol O-acyltransferase 2       |                |
| NM_032045       | KREMEN1 | kringle containing transmembrane         |                |
| NM_052972       | LRG1    | leucine rich alpha-2-glycoprotein 1      |                |
| NM_002863       | PYGL    | phosphorylase glycogen liver             |                |
|                 |         |                                          |                |
| NM_018644       | B3GAT1  | beta-13-glucuronyltransferase 1          | NK activation  |
| NM_000570       | FCGR3B  | Fc fragment of IgG receptor IIIb         |                |
| NM_006433       | GNLY    | granulysin                               |                |
| NM_002258       | KLRB1   | killer cell lectin like receptor B1      |                |
| NM_016523       | KLRF1   | killer cell lectin like receptor F1      |                |
| NM_005810       | KLRG1   | killer cell lectin like receptor G1      |                |
| NM_007360       | KLRK1   | killer cell lectin like receptor K1      |                |
| NM_005041       | PRF1    | perforin 1                               |                |
|                 |         |                                          |                |
| ENST00000344867 | KIR2DL2 | killer cell immunoglobulin like receptor | NK cell marker |
| NM_015868       | KIR2DL3 | killer cell immunoglobulin like receptor |                |
| NM_004829       | NCR1    | natural cytotoxicity triggering receptor |                |
| NM_147130       | NCR3    | natural cytotoxicity triggering receptor |                |

|              |          |                                          |                           |
|--------------|----------|------------------------------------------|---------------------------|
|              |          |                                          |                           |
| NM_172387    | NFATC1   | nuclear factor of activated T-cells 1    | PD-1 signaling            |
| NM_001198    | PRDM1    | PR domain 1                              |                           |
| NM_002015    | FOXO1    | forkhead box O1                          |                           |
| NM_001530    | HIF1A    | hypoxia inducible factor 1 alpha         |                           |
| NM_004958    | MTOR     | mechanistic target of rapamycin          |                           |
| NM_006218    | PIK3CA   | phosphatidylinositol-45-bisphosphate     |                           |
| NM_005026    | PIK3CD   | phosphatidylinositol-45-bisphosphate     |                           |
| NM_000314    | PTEN     | phosphatase and tensin homolog           |                           |
| NM_002834    | PTPN11   | protein tyrosine phosphatase non-        |                           |
|              |          |                                          |                           |
| NM_004336    | BUB1     | BUB1 mitotic checkpoint serine           | Proliferation             |
| NM_004701    | CCNB2    | cyclin B2                                |                           |
| NM_001786    | CDK1     | cyclin-dependent kinase 1                |                           |
| NM_005192    | CDKN3    | cyclin-dependent kinase inhibitor 3      |                           |
| NM_021953    | FOXM1    | forkhead box M1                          |                           |
| NM_014736    | KIAA0101 | KIAA0101                                 |                           |
| NM_002358    | MAD2L1   | MAD2 mitotic arrest deficient-like 1     |                           |
| NM_014791    | MELK     | maternal embryonic leucine zipper        |                           |
| NM_002417    | MKI67    | marker of proliferation Ki-67            |                           |
| NM_001067    | TOP2A    | topoisomerase DNA II alpha               |                           |
|              |          |                                          |                           |
| NM_000399    | EGR2     | early growth response 2                  | T cell differentiation    |
| NM_001110533 | LEXM     | lymphocyte expansion molecule            |                           |
|              |          |                                          |                           |
| NM_170662    | CBLB     | Cbl proto-oncogene B                     | T cell receptor signaling |
| NM_000074    | CD40LG   | CD40 ligand                              |                           |
| NM_021268    | IFNA17   | interferon alpha 17                      |                           |
| NM_020529    | NFKBIA   | NFKB inhibitor alpha                     |                           |
| NM_080548    | PTPN6    | protein tyrosine phosphatase non-        |                           |
| NM_001079    | ZAP70    | zeta chain of T cell receptor associated |                           |
|              |          |                                          |                           |
| NM_005755    | EBI3     | Epstein-Barr virus induced 3             | T cell regulation         |
| NM_014009    | FOXP3    | forkhead box P3                          |                           |
| NM_002166    | ID2      | inhibitor of DNA binding 2 HLH protein   |                           |
| NM_002167    | ID3      | inhibitor of DNA binding 3 HLH protein   |                           |
| NM_000585    | IL15     | interleukin 15                           |                           |
| NM_001562    | IL18     | interleukin 18                           |                           |
| NM_020525    | IL22     | interleukin 22                           |                           |
| NM_002355    | M6PR     | mannose-6-phosphate receptor cation      |                           |
| NM_016270    | KLF2     | Kruppel like factor 2                    |                           |
|              |          |                                          |                           |
| NM_001838    | CCR7     | C-C motif chemokine receptor 7           |                           |
| NM_198053    | CD247    | CD247 molecule                           |                           |
| NM_000732    | CD3D     | CD3d molecule                            |                           |
| NM_000733    | CD3E     | CD3e molecule                            |                           |
| NM_000073    | CD3G     | CD3g molecule                            |                           |
| NM_006725    | CD6      | CD6 molecule                             |                           |
| NM_171827    | CD8A     | CD8a molecule                            |                           |

|                 |              |                                        |                  |
|-----------------|--------------|----------------------------------------|------------------|
| NM_172213       | CD8B         | CD8b molecule                          | TCR coexpression |
| NM_019604       | CRTAM        | cytotoxic and regulatory T-cell        |                  |
| NM_001098200    | GPR18        | G protein-coupled receptor 18          |                  |
| NM_004810       | GRAP2        | GRB2-related adaptor protein 2         |                  |
| NM_012481       | IKZF3        | IKAROS family zinc finger 3            |                  |
| NM_000878       | IL2RB        | interleukin 2 receptor subunit beta    |                  |
| NM_002185       | IL7R         | interleukin 7 receptor                 |                  |
| NM_005546       | ITK          | IL2 inducible T-cell kinase            |                  |
| NM_014398       | LAMP3        | lysosomal associated membrane          |                  |
| NM_001042771    | LCK          | LCK proto-oncogene Src family tyrosine |                  |
| ENST00000326294 | PTPRCAP      | protein tyrosine phosphatase receptor  |                  |
| NM_173799       | TIGIT        | T-cell immunoreceptor with Ig and ITIM |                  |
|                 |              |                                        |                  |
| NM_182482       | BAGE         | B melanoma antigen                     | Tumor antigen    |
| NM_001327       | CTAG1B       | cancer testis antigen 1B               |                  |
| ENST00000369585 | CTAG2        | cancer testis antigen 2                |                  |
| NM_001040663    | GAGE1,GAGE12 | G antigen 1                            |                  |
| NM_001098413    | GAGE10       | G antigen 10                           |                  |
| NM_001098406    | GAGE12J      | G antigen 12J                          |                  |
| NM_001098412    | GAGE13       | G antigen 13                           |                  |
| NM_001472       | GAGE2C,GAGE2 | G antigen 2C                           |                  |
| NM_004988       | MAGEA1       | MAGE family member A1                  |                  |
| NM_021048       | MAGEA10      | MAGE family member A10                 |                  |
| NM_005367       | MAGEA12      | MAGE family member A12                 |                  |
| NM_005362       | MAGEA3       | MAGE family member A3                  |                  |
| NM_001011548    | MAGEA4       | MAGE family member A4                  |                  |
| NM_016249       | MAGEC2       | MAGE family member C2                  |                  |
| NM_005511       | MLANA        | melan-A                                |                  |
| NM_003147       | SSX2         | SSX family member 2                    |                  |
| NM_001097594    | XAGE1B       | X antigen family member 1B             |                  |
|                 |              |                                        |                  |
| NM_001014431    | AKT1         | AKT serine threonine kinase 1          | Tumor marker     |
| NM_007300       | BRCA1        | BRCA1 DNA repair associated            |                  |
| NM_000059       | BRCA2        | BRCA2 DNA repair associated            |                  |
| NM_000077       | CDKN2A       | cyclin-dependent kinase inhibitor 2A   |                  |
| NM_005227       | EFNA4        | ephrin A4                              |                  |
| NM_005228       | EGFR         | epidermal growth factor receptor       |                  |
| NM_004430       | EGR3         | early growth response 3                |                  |
| NM_005544       | IRS1         | insulin receptor substrate 1           |                  |
| NM_000424       | KRT5         | keratin 5                              |                  |
| NM_005556       | KRT7         | keratin 7                              |                  |
| NM_002745       | MAPK1        | mitogen-activated protein kinase 1     |                  |
| NM_004530       | MMP2         | matrix metalloproteinase 2             |                  |
| NM_004994       | MMP9         | matrix metalloproteinase 9             |                  |
| NM_002467       | MYC          | v-myc avian myelocytomatosis viral     |                  |
| NM_000435       | NOTCH3       | notch 3                                |                  |
| NM_002632       | PGF          | placental growth factor                |                  |
| NM_000963       | PTGS2        | prostaglandin-endoperoxide synthase    |                  |
| NM_002821       | PTK7         | protein tyrosine kinase 7 inactive     |                  |



|              |         |                                          |                              |
|--------------|---------|------------------------------------------|------------------------------|
| NM_000321    | RB1     | RB transcriptional corepressor 1         |                              |
| NM_001010    | RPS6    | ribosomal protein S6                     |                              |
| NM_003202    | TCF7    | transcription factor 7 T-cell specific   |                              |
| NM_003722    | TP63    | tumor protein p63                        |                              |
| NM_012101    | TRIM29  | tripartite motif containing 29           |                              |
| NM_005985    | SNAI1   | snail family transcriptional repressor 1 |                              |
| NM_003068    | SNAI2   | snail family transcriptional repressor 2 |                              |
| NM_000474    | TWIST1  | twist family bHLH transcription factor 1 |                              |
| NM_001174093 | ZEB1    | zinc finger E-box binding homeobox 1     |                              |
|              |         |                                          |                              |
| NM_004335    | BST2    | bone marrow stromal cell antigen 2       | Type I interferon signaling  |
| NM_005532    | IFI27   | interferon alpha inducible protein 27    |                              |
| NM_001548    | IFIT1   | interferon induced protein with          |                              |
| NM_001031683 | IFIT3   | interferon induced protein with          |                              |
| NM_003641    | IFITM1  | interferon induced transmembrane         |                              |
| NM_006435    | IFITM2  | interferon induced transmembrane         |                              |
| NM_005101    | ISG15   | ISG15 ubiquitin-like modifier            |                              |
| NM_002201    | ISG20   | interferon stimulated exonuclease        |                              |
|              |         |                                          |                              |
| NM_001706    | BCL6    | B-cell CLL lymphoma 6                    | Type II interferon signaling |
| NM_000246    | CIITA   | class II major histocompatibility        |                              |
| NM_002996    | CX3CL1  | C-X3-C motif chemokine ligand 1          |                              |
| NM_001565    | CXCL10  | C-X-C motif chemokine ligand 10          |                              |
| NM_005409    | CXCL11  | C-X-C motif chemokine ligand 11          |                              |
| NM_006419    | CXCL13  | C-X-C motif chemokine ligand 13          |                              |
| NM_002416    | CXCL9   | C-X-C motif chemokine ligand 9           |                              |
| NM_001716    | CXCR5   | C-X-C motif chemokine receptor 5         |                              |
| NM_000397    | CYBB    | cytochrome b-245 beta chain              |                              |
| NM_001135651 | EIF2AK2 | eukaryotic translation initiation factor |                              |
| NM_000639    | FASLG   | Fas ligand                               |                              |
| NM_002053    | GBP1    | guanylate binding protein 1              |                              |
| NM_000201    | ICAM1   | intercellular adhesion molecule 1        |                              |
| NM_002176    | IFNB1   | interferon beta 1                        |                              |
| NM_000619    | IFNG    | interferon gamma                         |                              |
| NM_000576    | IL1B    | interleukin 1 beta                       |                              |
| NM_002198    | IRF1    | interferon regulatory factor 1           |                              |
| NM_006084    | IRF9    | interferon regulatory factor 9           |                              |
| NM_016816    | OAS1    | 2-5-oligoadenylate synthetase 1          |                              |
| NM_002800    | PSMB9   | proteasome subunit beta 9                |                              |
| NM_007315    | STAT1   | signal transducer and activator of       |                              |
| NM_000593    | TAP1    | transporter 1 ATP-binding cassette sub-  |                              |
| NM_013351    | TBX21   | T-box 21                                 |                              |
